# Supplementary figures and images for: Death of p53-defective cells triggered by forced mitotic entry in the presence of DNA damage is not uniquely dependent on Caspase-2 or the PIDDosome
Source: PubMed Central journal article supplement — Cell Death Dis. 2013 Dec 5;4(12):e942–. doi: 10.1038/cddis.2013.470 (PMC3877543; doi:10.1038/cddis.2013.470), 2013-12-05

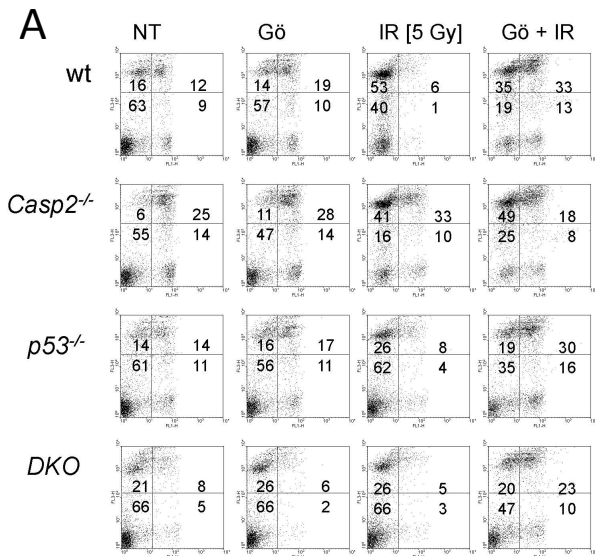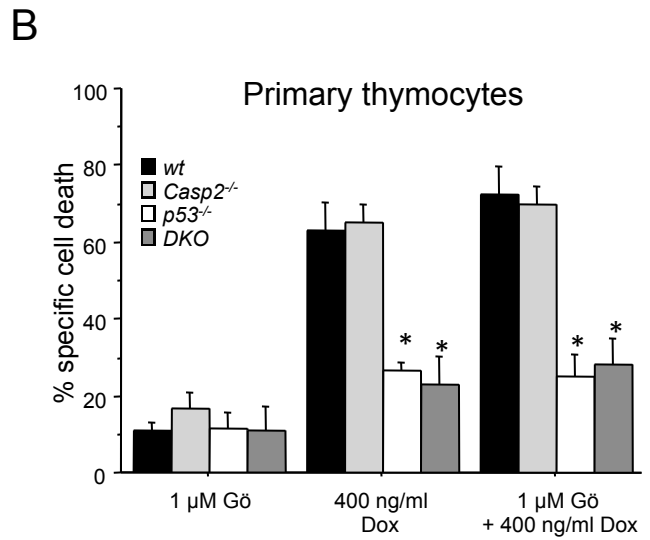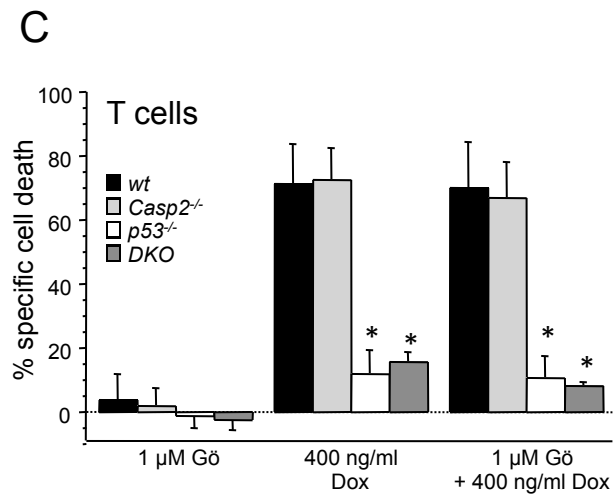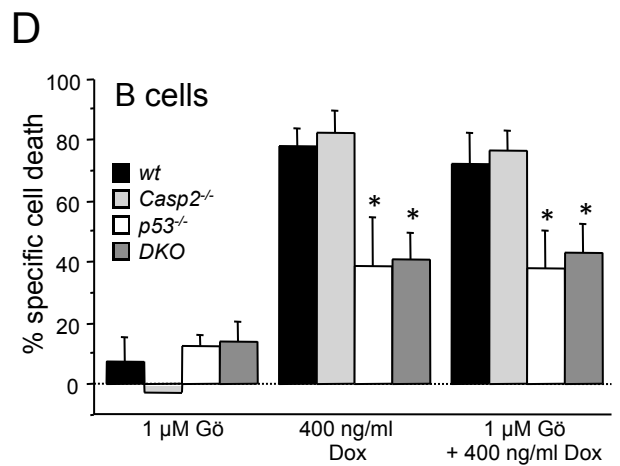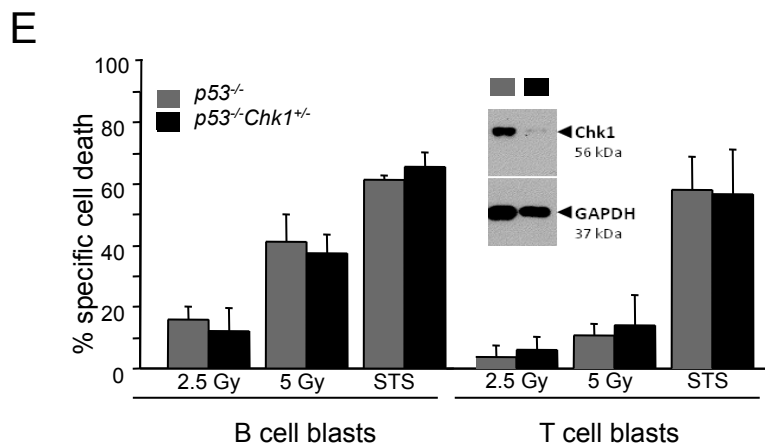

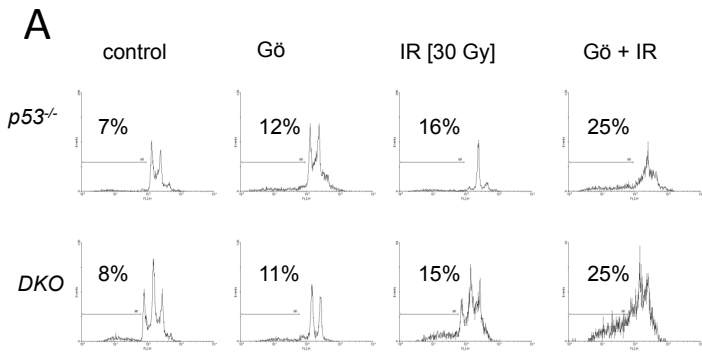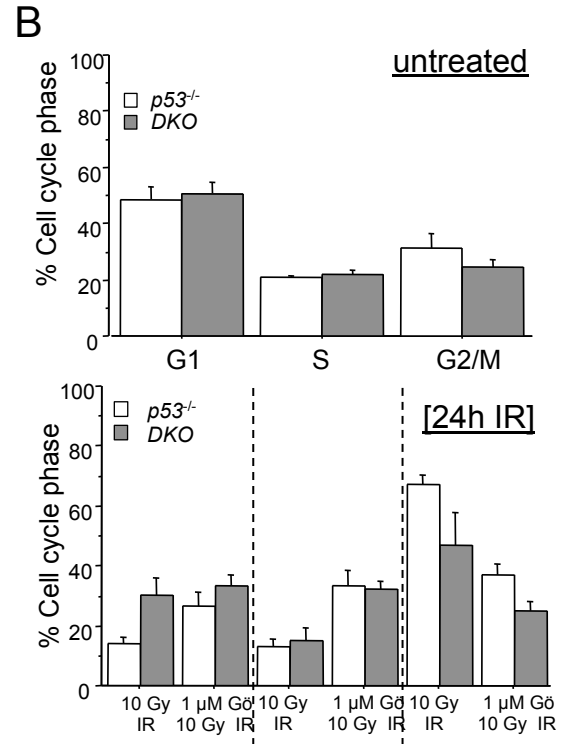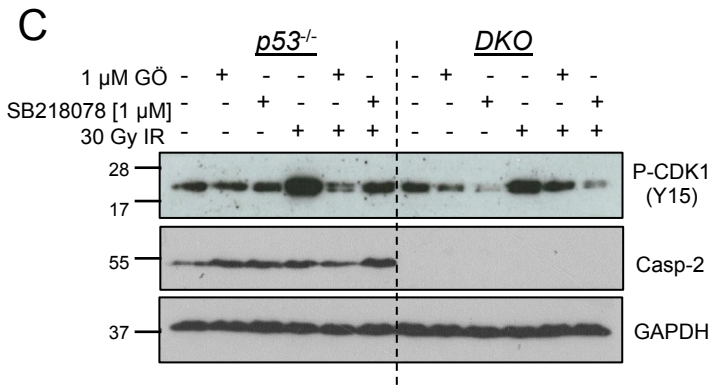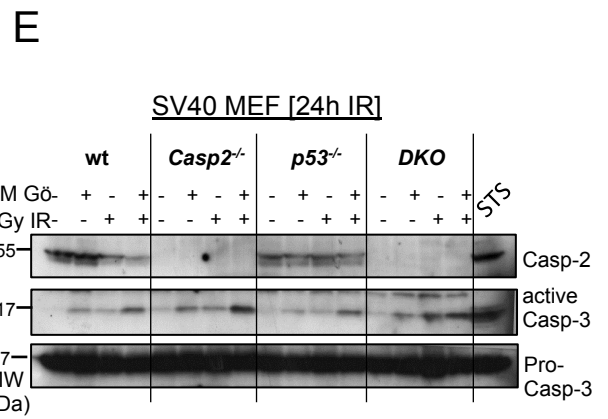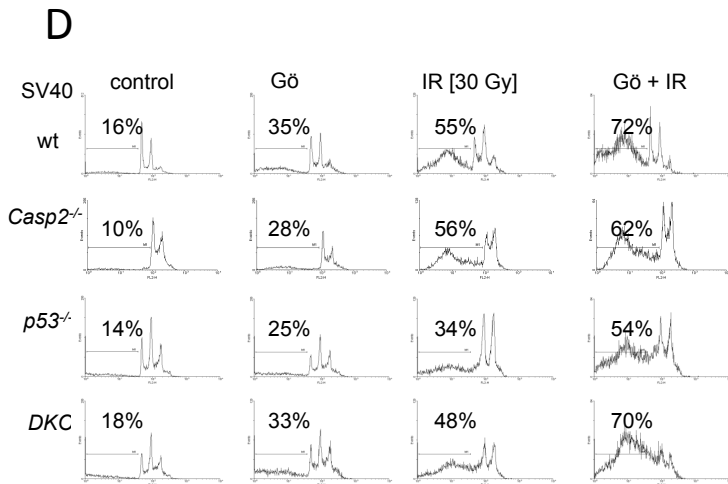

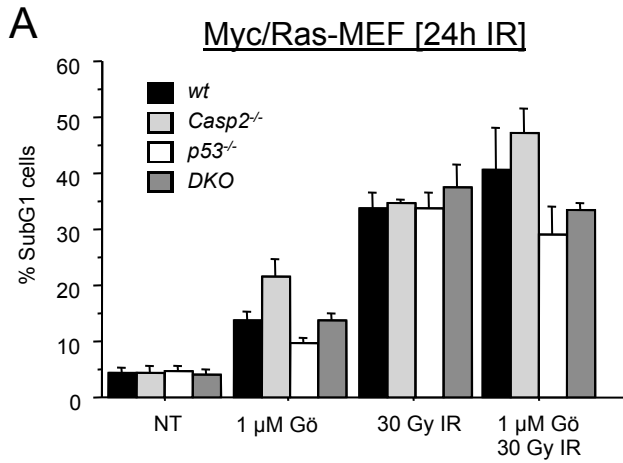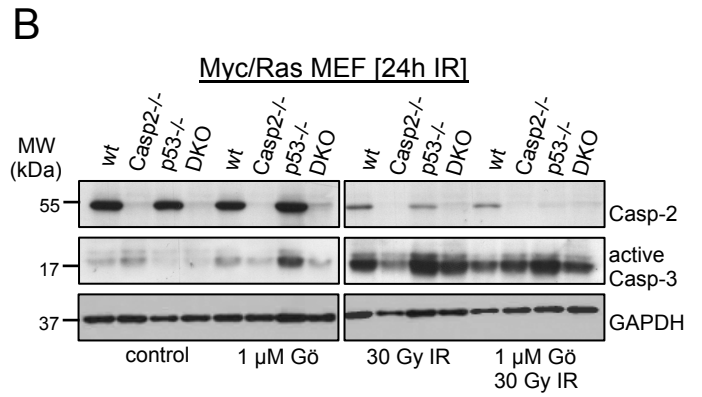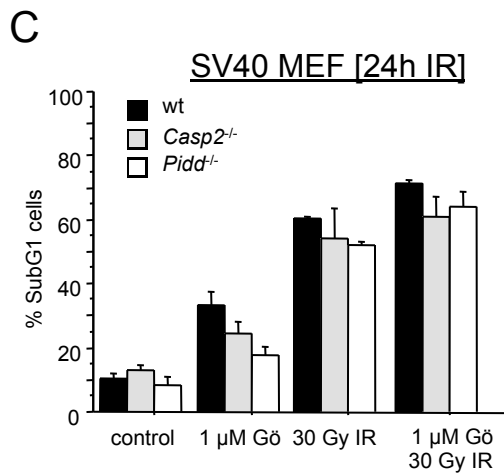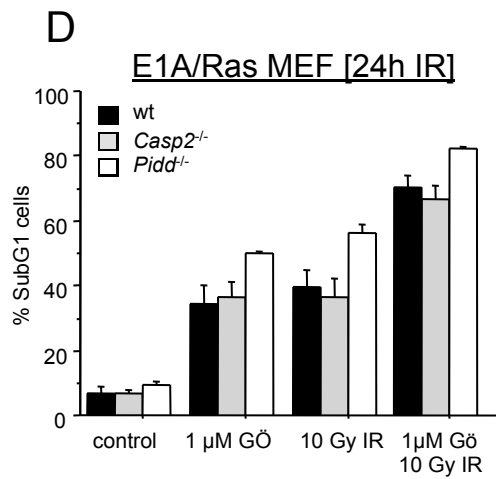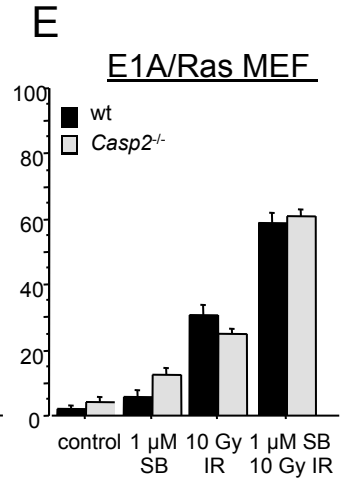

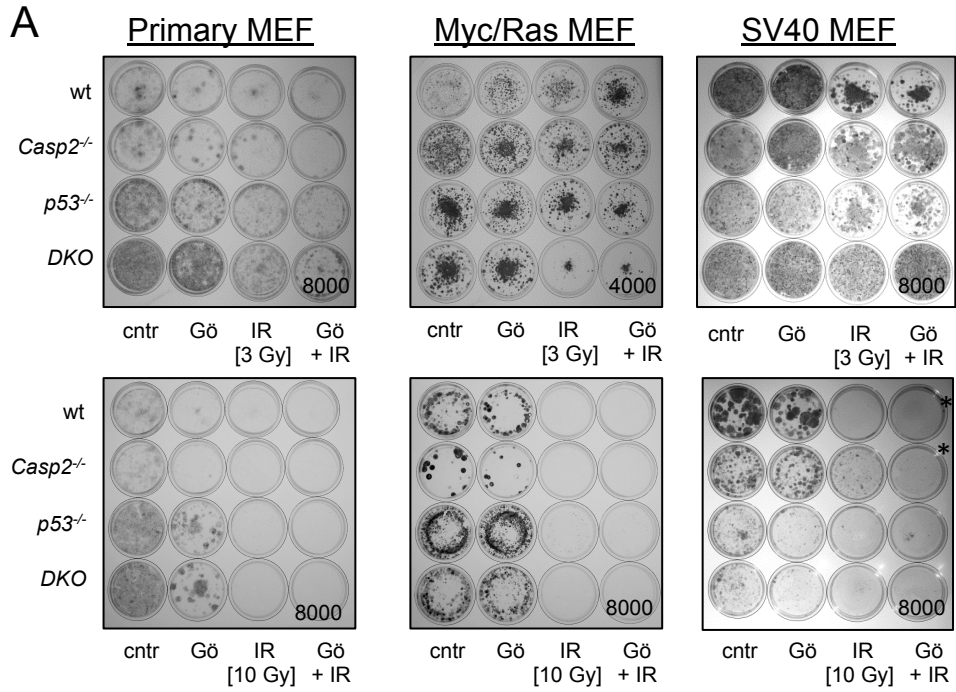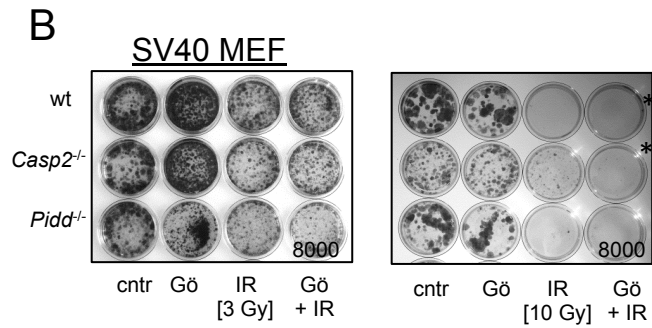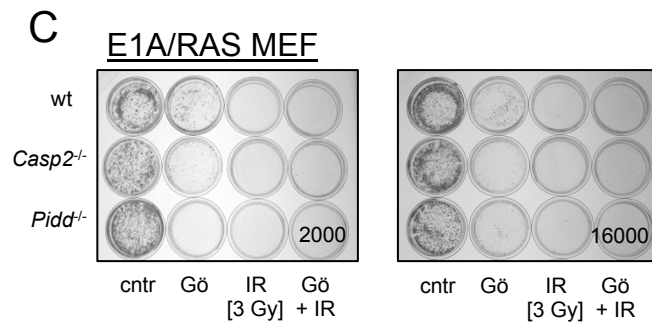

Supplement: cddis2013470x1.pdf [file cddis2013470x1.pdf]
